# Supplementary material for: Synthesis,in vitrocytotoxicity, and structure–activity relationships (SAR) of multidentate oxidovanadium(iv) complexes as anticancer agents
Source: Royal Society of Chemistry journal article supplement (doi:10.1039/c8dt01778f), 2018-01-01
Supplement: c8dt01778f1.pdf [file c8dt01778f1.pdf]

## Supporting Information

### **Synthesis, In vitro Cytotoxicity, and Structure–activity Relationship (SAR) studies of Multidentate Oxidovanadium(IV) Complexes as Anticancer Agents**

Lubin Ni,<sup>‡a</sup> Hongxia Zhao,<sup>‡a</sup> Li Tao,<sup>b</sup> Xing Li,<sup>c</sup> Zhaohui Zhou,<sup>\*c</sup> Yun Sun,<sup>b</sup> Chong Chen,<sup>d</sup> Duo Wei,<sup>d</sup>

Yanqing Liu,<sup>\*b</sup> Guowang Diao,<sup>\*a</sup>

<sup>a</sup> School of Chemistry and Chemical Engineering, Yangzhou University, Yangzhou 225002, Jiangsu, People's Republic of China.

<sup>b</sup> College of Medicine, Yangzhou University, Yangzhou 225001, People's Republic of China.

<sup>c</sup> State Key Laboratory for Physical Chemistry of Solid Surfaces, College of Chemistry and Chemical Engineering, Xiamen University, Xiamen 361005, People's Republic of China.

<sup>d</sup> Testing Center, Yangzhou University, Yangzhou, 225002 Jiangsu, P. R. China.

<sup>‡</sup> These authors contributed equally.

## Contents

### Experimental Section

Table S1. Crystallographic data and structural refinement details for compound **1**

[VO(ox)(bpy)(H<sub>2</sub>O)] and compound **2** [VO(ox)(phen)(H<sub>2</sub>O)]. S5

Table S2. Crystallographic data and structural refinement details for compound **3**

[VO(ida)(bpy)]·2H<sub>2</sub>O and compound **4** (phen)[VO(ida)(phen)]·4H<sub>2</sub>O. S6

Table S3. Crystallographic data and structural refinement details for compound **5**

|                                                                                                                                                                               |     |
|-------------------------------------------------------------------------------------------------------------------------------------------------------------------------------|-----|
| (Hphen)[VO(нта)(phen)]·2H <sub>2</sub> O.                                                                                                                                     | S7  |
| Table S4. Selected bond distances (Å) and angles (°) for compound <b>1</b> and <b>2</b>                                                                                       | S8  |
| Table S5. Selected bond distances (Å) and angles (°) for compound <b>3</b> [VO(ida)(bpy)]·2H <sub>2</sub> O and<br>compound <b>4</b> (phen)[VO(ida)(phen)]·4H <sub>2</sub> O. | S9  |
| Table S6. Selected bond distances (Å) and angles (°) for compound <b>5</b> (Hphen)[VO(H <sub>2</sub> O)(нта)]·2H <sub>2</sub> O.                                              | S10 |
| Table S7. Hydrogen bonds observed in compound <b>3</b> [VO(ida)(bpy)]·2H <sub>2</sub> O.                                                                                      | S10 |
| Table S8. Hydrogen bonds observed in compound <b>4</b> (phen)[VO(ida)(phen)]·4H <sub>2</sub> O.                                                                               | S11 |
| Table S9. Hydrogen bonds observed in compound <b>5</b> (Hphen)[VO(H <sub>2</sub> O)(нта)]·2H <sub>2</sub> O.                                                                  | S11 |
| Table S10. The comparison of anti-proliferation activity for compound <b>2</b> , the marketed platinum-<br>based drugs and other vanadium(IV) on hepatoma cells.              | S12 |
| Figure S1. Calculated and experimental PXRD patterns of compound <b>1</b> .                                                                                                   | S13 |
| Figure S2. Calculated and experimental PXRD patterns of compound <b>2</b> .                                                                                                   | S13 |
| Figure S3. Calculated and experimental PXRD patterns of compound <b>3</b> .                                                                                                   | S14 |
| Figure S4. Calculated and experimental PXRD patterns of compound <b>4</b> .                                                                                                   | S14 |
| Figure S5. Calculated and experimental PXRD patterns of compound <b>5</b> .                                                                                                   | S15 |
| Figure S6. Solid state <sup>13</sup> C NMR spectrum of compound <b>2</b> .                                                                                                    | S15 |
| Figure S7. The FT-IR spectrum of vanadyl compound <b>1</b> .                                                                                                                  | S16 |

|                                                                                                                                             |     |
|---------------------------------------------------------------------------------------------------------------------------------------------|-----|
| Figure S8. The FT-IR spectrum of vanadyl compound <b>2</b> .                                                                                | S16 |
| Figure S9. The FT-IR spectrum of vanadyl compound <b>3</b> .                                                                                | S17 |
| Figure S10. The FT-IR spectrum of vanadyl compound <b>4</b> .                                                                               | S17 |
| Figure S11. The FT-IR spectrum of vanadyl compound <b>5</b> .                                                                               | S18 |
| Figure S12. The solid diffuse UV-Vis spectrum of vanadyl compound <b>1</b> .                                                                | S18 |
| Figure S13. The solid diffuse UV-Vis spectrum of vanadyl compound <b>2</b> .                                                                | S19 |
| Figure S14. The solid diffuse UV-Vis spectrum of vanadyl compound <b>3</b> .                                                                | S19 |
| Figure S15. The solid diffuse UV-Vis spectrum of vanadyl compound <b>4</b> .                                                                | S20 |
| Figure S16. The solid diffuse UV-Vis spectrum of vanadyl compound <b>5</b> .                                                                | S20 |
| Figure S17. The thermal gravimetric analysis of compound <b>2</b> .                                                                         | S21 |
| Figure S18. The thermal gravimetric analysis of compound <b>5</b> .                                                                         | S21 |
| Figure S19. EPR spectra of compounds <b>1-5</b> in DMSO at 130 K (t = 0 h)                                                                  | S22 |
| Figure S20. X-band EPR spectra in solid state of (a) compound <b>3</b> , (b) compound <b>5</b> at various temperatures.                     | S22 |
| Figure S21. ESI-MS spectrum of compound <b>5</b> in the positive ion mode.                                                                  | S23 |
| Figure S22. SMMC-7721 and HepG2 cells were incubated with various concentrations of compound <b>2</b> , and ligands for 48 h, respectively. | S23 |

Figure S23. Inhibitory effect of compound **2** on SMMC-7721, HepG2 and 293T cells after 48 h (n = 3, error bar = S.D.).

S24

**Table S1.** Crystallographic data and structural refinement details for compound **1** and compound **2**.

|                                                              | <b>1</b>                                                        | <b>2</b>                                                        |
|--------------------------------------------------------------|-----------------------------------------------------------------|-----------------------------------------------------------------|
| Empirical formula                                            | C <sub>12</sub> H <sub>10</sub> N <sub>2</sub> O <sub>6</sub> V | C <sub>14</sub> H <sub>10</sub> N <sub>2</sub> O <sub>6</sub> V |
| Formula weight                                               | 329.16                                                          | 353.18                                                          |
| Temperature, K                                               | 173(2)                                                          | 173(2)                                                          |
| Wavelength, Å                                                | Mo <i>K</i> α (0.71073)                                         | Mo <i>K</i> α (0.71073)                                         |
| Crystal system                                               | Monoclinic                                                      | Triclinic                                                       |
| Space group                                                  | <i>P</i> 2 <sub>1</sub> /n                                      | <i>P</i> $\bar{1}$                                              |
| Unit cell dimensions                                         |                                                                 |                                                                 |
| a, Å                                                         | 12.532(1)                                                       | 7.615 (1)                                                       |
| b, Å                                                         | 7.554(1)                                                        | 9.752(1)                                                        |
| c, Å                                                         | 14.088 (1)                                                      | 9.767(1)                                                        |
| α, °                                                         |                                                                 | 89.827(6)                                                       |
| β, °                                                         | 96.707(4)                                                       | 74.344(7)                                                       |
| γ, °                                                         |                                                                 | 81.007(6)                                                       |
| V, Å <sup>3</sup>                                            | 1324.47(2)                                                      | 689.26(9)                                                       |
| Z                                                            | 4                                                               | 2                                                               |
| D (calculated), g/cm <sup>3</sup>                            | 1.651                                                           | 1.702                                                           |
| Abs. coeff., mm <sup>-1</sup>                                | 0.779                                                           | 0.755                                                           |
| F(000)                                                       | 668                                                             | 358                                                             |
| Crystal size, mm                                             | 0.20×0.18×0.10                                                  | 0.15×0.15×0.10                                                  |
| θ range for data collection, °                               | 3.08 ~ 27.00                                                    | 2.97 ~ 27.00                                                    |
| Reflections collected / unique / R <sub>int</sub>            | 5817/28460.0458                                                 | 4840/2962/0.0280                                                |
| Data / restraints / parameters                               | 2846 / 3 / 198                                                  | 2962 / 3 / 216                                                  |
| GOF on F <sup>2</sup>                                        | 1.073                                                           | 1.053                                                           |
| Final R indices R <sub>1</sub> , ωR <sub>2</sub> [I > 2σ(I)] | 0.0561, 0.1097                                                  | 0.0351, 0.0845                                                  |
| R indices R <sub>1</sub> , ωR <sub>2</sub> [all data]        | 0.0820, 0.1197                                                  | 0.0417, 0.0889                                                  |
| Largest diff. peak and hole, e. Å <sup>-3</sup>              | 0.366/-0.451                                                    | 0.434/-0.341                                                    |

**Table S2.** Crystallographic data and structural refinement details for compound **3** and compound **4**.

|                                                                               | <b>3</b>                                                        | <b>4</b>                                                        |
|-------------------------------------------------------------------------------|-----------------------------------------------------------------|-----------------------------------------------------------------|
| Empirical formula                                                             | C <sub>14</sub> H <sub>17</sub> N <sub>3</sub> O <sub>7</sub> V | C <sub>28</sub> H <sub>29</sub> N <sub>5</sub> O <sub>9</sub> V |
| Formula weight                                                                | 390.25                                                          | 630.50                                                          |
| Temperature, K                                                                | 173(2)                                                          | 173(2)                                                          |
| Wavelength, Å                                                                 | Mo <i>K</i> α (0.71073)                                         | Mo <i>K</i> α (0.71073)                                         |
| Crystal system                                                                | Monoclinic                                                      | Monoclinic                                                      |
| Space group                                                                   | <i>P</i> 2 <sub>1</sub> / <i>c</i>                              | <i>P</i> 2 <sub>1</sub> / <i>c</i>                              |
| Unit cell dimensions                                                          |                                                                 |                                                                 |
| a, Å                                                                          | 9.024(1)                                                        | 7.156(1)                                                        |
| b, Å                                                                          | 15.584(1)                                                       | 19.676(2)                                                       |
| c, Å                                                                          | 11.820(1)                                                       | 19.862(2)                                                       |
| α, °                                                                          |                                                                 |                                                                 |
| β, °                                                                          | 100.912(3)                                                      | 95.826(7)                                                       |
| γ, °                                                                          |                                                                 |                                                                 |
| V, Å <sup>3</sup>                                                             | 1632.26(9)                                                      | 2781.9(3)                                                       |
| Z                                                                             | 4                                                               | 4                                                               |
| D (calculated), g/cm <sup>3</sup>                                             | 1.588                                                           | 1.505                                                           |
| Abs. coeff., mm <sup>-1</sup>                                                 | 0.651                                                           | 0.421                                                           |
| F(000)                                                                        | 804                                                             | 1308                                                            |
| Crystal size, mm                                                              | 0.18×0.15×0.08                                                  | 0.20×0.10×0.10                                                  |
| θ range for data collection, °                                                | 3.15 ~ 27.00                                                    | 2.92 ~ 26.00                                                    |
| Reflections collected / unique / R <sub>int</sub>                             | 6328/3469/0.0501                                                | 12451/5452/0.0584                                               |
| Data / restraints / parameters                                                | 3469/6/238                                                      | 5452/12/412                                                     |
| GOF on F <sup>2</sup>                                                         | 1.050                                                           | 1.037                                                           |
| Final R indices R <sub>1</sub> , ωR <sub>2</sub> [ <i>I</i> > 2σ( <i>I</i> )] | 0.0499, 0.1062                                                  | 0.0584, 0.1049                                                  |
| R indices R <sub>1</sub> , ωR <sub>2</sub> [all data]                         | 0.0658, 0.1152                                                  | 0.0888, 0.1171                                                  |
| Largest diff. peak and hole, e. Å <sup>-3</sup>                               | 0.378/-0.360                                                    | 0.307/-0.464                                                    |

**Table S3.** Crystallographic data and structural refinement details for compound **5**.

|                                                                                                              | <b>5</b>                                                         |
|--------------------------------------------------------------------------------------------------------------|------------------------------------------------------------------|
| Empirical formula                                                                                            | C <sub>18</sub> H <sub>21</sub> N <sub>3</sub> O <sub>10</sub> V |
| Formula weight                                                                                               | 490.32                                                           |
| Temperature, K                                                                                               | 173(2)                                                           |
| Wavelength, Å                                                                                                | Mo K $\alpha$ (0.71073)                                          |
| Crystal system                                                                                               | Monoclinic                                                       |
| Space group                                                                                                  | <i>P</i> 2 <sub>1</sub> /c                                       |
| Unit cell dimensions                                                                                         |                                                                  |
| a, Å                                                                                                         | 8.162(1)                                                         |
| b, Å                                                                                                         | 23.355(1)                                                        |
| c, Å                                                                                                         | 11.045(1)                                                        |
| $\alpha$ , °                                                                                                 |                                                                  |
| $\beta$ , °                                                                                                  | 106.358(4)                                                       |
| $\gamma$ , °                                                                                                 |                                                                  |
| V, Å <sup>3</sup>                                                                                            | 2020.36(2)                                                       |
| Z                                                                                                            | 4                                                                |
| <i>D</i> (calculated), g/cm <sup>3</sup>                                                                     | 1.612                                                            |
| Abs. coeff., mm <sup>-1</sup>                                                                                | 0.555                                                            |
| <i>F</i> (000)                                                                                               | 1012                                                             |
| Crystal size, mm                                                                                             | 0.20×0.20×0.20                                                   |
| $\theta$ range for data collection, °                                                                        | 2.90 ~ 26.00                                                     |
| Reflections collected / unique / <i>R</i> <sub>int</sub>                                                     | 8402/3960/0.0352                                                 |
| Data / restraints / parameters                                                                               | 3960/9/309                                                       |
| GOF on <i>F</i> <sup>2</sup>                                                                                 | 1.048                                                            |
| Final <i>R</i> indices <i>R</i> <sub>1</sub> , $\omega R$ <sub>2</sub> [ <i>I</i> > 2 $\sigma$ ( <i>I</i> )] | 0.0404, 0.0847                                                   |
| <i>R</i> indices <i>R</i> <sub>1</sub> , $\omega R$ <sub>2</sub> [all data]                                  | 0.0532, 0.0899                                                   |
| Largest diff. peak and hole, e. Å <sup>-3</sup>                                                              | 0.301/-0.433                                                     |

**Table S4.** Selected bond distances (Å) and angles (°) for compound **1** [VO(ox)(bpy)(H<sub>2</sub>O)] and compound **2** [VO(ox)(phen)(H<sub>2</sub>O)].

| <b>1</b>        |          |                 |          |
|-----------------|----------|-----------------|----------|
| V(1)–O(5)       | 1.581(2) | V(1)–O(1w)      | 2.034(2) |
| V(1)–O(1)       | 1.996(2) | V(1)–N(1)       | 2.129(3) |
| V(1)–O(2)       | 1.999(2) | V(1)–N(2)       | 2.283(3) |
| O(5)–V(1)–O(1)  | 101.8(1) | O(2)–V(1)–N(1)  | 160.9(1) |
| O(5)–V(1)–O(2)  | 105.7(1) | O(1w)–V(1)–N(1) | 95.9(1)  |
| O(1)–V(1)–O(2)  | 80.8(1)  | O(5)–V(1)–N(2)  | 164.5(1) |
| O(5)–V(1)–O(1w) | 98.0(1)  | O(1)–V(1)–N(2)  | 84.2(1)  |
| O(1)–V(1)–O(1w) | 159.1(1) | O(2)–V(1)–N(2)  | 89.3(1)  |
| O(2)–V(1)–O(1w) | 87.4(1)  | O(1w)–V(1)–N(2) | 78.4(1)  |
| O(5)–V(1)–N(1)  | 92.5(1)  | N(1)–V(1)–N(2)  | 73.0(1)  |
| O(1)–V(1)–N(1)  | 90.0(1)  |                 |          |
| <b>2</b>        |          |                 |          |
| V(1)–O(5)       | 1.591(2) | V(1)–O(1w)      | 2.030(2) |
| V(1)–O(1)       | 2.002(1) | V(1)–N(1)       | 2.319(2) |
| V(1)–O(2)       | 1.994(1) | V(1)–N(2)       | 2.121(2) |
| O(5)–V(1)–O(1)  | 101.2(1) | O(2)–V(1)–N(1)  | 87.2(1)  |
| O(5)–V(1)–O(2)  | 105.3(1) | O(1w)–V(1)–N(1) | 80.2(1)  |
| O(1)–V(1)–O(2)  | 81.0(1)  | O(5)–V(1)–N(2)  | 93.8(1)  |
| O(5)–V(1)–O(1w) | 99.4(1)  | O(1)–V(1)–N(2)  | 92.6(1)  |
| O(1)–V(1)–O(1w) | 158.6(1) | O(2)–V(1)–N(2)  | 160.7(1) |
| O(2)–V(1)–O(1w) | 88.3(1)  | O(1w)–V(1)–N(2) | 91.5(1)  |
| O(5)–V(1)–N(1)  | 167.4(1) | N(1)–V(1)–N(2)  | 73.7(1)  |
| O(1)–V(1)–N(1)  | 80.9(1)  |                 |          |



**Table S5.** Selected bond distances (Å) and angles (°) for compound **3** [VO(ida)(bpy)]·2H<sub>2</sub>O and compound **4** (phen)[VO(ida)(phen)]·4H<sub>2</sub>O.

| <b>3</b>       |           |                |           |
|----------------|-----------|----------------|-----------|
| V(1)–O(1)      | 1.990(2)  | V(1)–N(1)      | 2.331(2)  |
| V(1)–O(3)      | 1.995(2)  | V(1)–N(2)      | 2.103(2)  |
| V(1)–O(5)      | 1.601(2)  | V(1)–N(3)      | 2.116(2)  |
| O(5)–V(1)–O(1) | 98.3(1)   | O(3)–V(1)–N(3) | 90.3(1)   |
| O(5)–V(1)–O(3) | 101.0(1)  | N(2)–V(1)–N(3) | 76.9 (1)  |
| O(1)–V(1)–O(3) | 92.6 (1)  | O(5)–V(1)–N(1) | 174.1(1)  |
| O(5)–V(1)–N(2) | 100.8(1)  | O(1)–V(1)–N(1) | 76.6 (1)  |
| O(1)–V(1)–N(2) | 92.8(1)   | O(3)–V(1)–N(1) | 76.4(1)   |
| O(3)–V(1)–N(2) | 156.6(1)  | N(2)–V(1)–N(1) | 82.7(1)   |
| O(5)–V(1)–N(3) | 101.6(1)  | N(3)–V(1)–N(1) | 83.9(1)   |
| O(1)–V(1)–N(3) | 159.0(1)  |                |           |
| <b>4</b>       |           |                |           |
| V(1)–O(1)      | 1.994(2)  | V(1)–N(1)      | 2.341(2)  |
| V(1)–O(3)      | 2.008(2)  | V(1)–N(2)      | 2.113(2)  |
| V(1)–O(5)      | 1.589(2)  | V(1)–N(3)      | 2.129(2)  |
| O(5)–V(1)–O(1) | 101.5(1)  | O(3)–V(1)–N(3) | 92.7 (1)  |
| O(5)–V(1)–O(3) | 95.9 (1)  | N(2)–V(1)–N(3) | 78.0(1)   |
| O(1)–V(1)–O(3) | 94.5(1)   | O(5)–V(1)–N(1) | 170.6 (1) |
| O(5)–V(1)–N(2) | 98.3 (1)  | O(1)–V(1)–N(1) | 77.1(1)   |
| O(1)–V(1)–N(2) | 89.1(1)   | O(3)–V(1)–N(1) | 75.0(1)   |
| O(3)–V(1)–N(2) | 164.3 (1) | N(2)–V(1)–N(1) | 91.0(1)   |
| O(5)–V(1)–N(3) | 101.7 (1) | N(3)–V(1)–N(1) | 81.5(1)   |
| O(1)–V(1)–N(3) | 154.8 (1) |                |           |

**Table S6.** Selected bond distances (Å) and angles (°) for compound **5**  
(Hphen)[VO(H<sub>2</sub>O)(nta)]·2H<sub>2</sub>O.

|                 |           |                 |           |
|-----------------|-----------|-----------------|-----------|
| V(1)–O(1)       | 2.014(2)  | V(1)–O(7)       | 1.601(2)  |
| V(1)–O(3)       | 2.002(2)  | V(1)–O(1)W      | 2.032(2)  |
| V(1)–O(5)       | 2.012(2)  | V(1)–N(1)       | 2.317(2)  |
| O(7)–V(1)–O(3)  | 105.3(1)  | O(5)–V(1)–O(1)W | 165.5 (1) |
| O(7)–V(1)–O(5)  | 94.4(1)   | O(1)–V(1)–O(1)W | 86.6(1)   |
| O(3)–V(1)–O(5)  | 90.7 (1)  | O(7)–V(1)–N(1)  | 171.7 (1) |
| O(7)–V(1)–O(1)  | 103.8 (1) | O(3)–V(1)–N(1)  | 75.3(1)   |
| O(3)–V(1)–O(1)  | 150.9(1)  | O(5)–V(1)–N(1)  | 77.4(1)   |
| O(5)–V(1)–O(1)  | 90.0(1)   | O(1)–V(1)–N(1)  | 76.2(1)   |
| O(7)–V(1)–O(1)W | 100.1(1)  | O(1)W–V(1)–N(1) | 88.2(1)   |
| O(3)–V(1)–O(1)W | 86.5 (1)  |                 |           |

**Table S7.** Hydrogen bonds observed in compound **3** [VO(ida)(bpy)]·2H<sub>2</sub>O.

| <i>D</i> – <i>H</i> ··· <i>A</i> | <i>D</i> – <i>H</i> (Å) | <i>H</i> ··· <i>A</i> (Å) | <i>D</i> ··· <i>A</i> (Å) | <i>D</i> – <i>H</i> ··· <i>A</i> (°) |
|----------------------------------|-------------------------|---------------------------|---------------------------|--------------------------------------|
| N1–H···O1w <sup>a</sup>          | 0.930                   | 2.175                     | 2.959                     | 141.33                               |
| N1–H···O2w <sup>b</sup>          | 0.930                   | 2.505                     | 3.248                     | 137.05                               |
| O2w–H···O4                       | 0.852                   | 1.917                     | 2.755                     | 167.32                               |
| O1w–H···O2                       | 0.850                   | 1.915                     | 2.760                     | 172.31                               |
| O2w–H···O2 <sup>c</sup>          | 0.851                   | 2.145                     | 2.961                     | 160.44                               |
| O1w–H···O2w <sup>d</sup>         | 0.850                   | 2.067                     | 2.797                     | 143.56                               |

Symmetry transformations: (a)  $x + 1, y, z$ ; (b)  $x, -y + \frac{1}{2}, z - \frac{1}{2}$ ; (c)  $-x - 1, y + \frac{1}{2}, -z + \frac{1}{2}$ ; (d)  $x - 1, -y + \frac{1}{2}, z - 1$ .

**Table S8.** Hydrogen bonds observed in compound **4** (phen)[VO(ida)(phen)]·4H<sub>2</sub>O.

| <i>D</i> – <i>H</i> ⋯ <i>A</i>                  | <i>D</i> – <i>H</i> (Å) | <i>H</i> ⋯ <i>A</i> (Å) | <i>D</i> ⋯ <i>A</i> (Å) | <i>D</i> – <i>H</i> ⋯ <i>A</i> ( <sup>o</sup> ) |
|-------------------------------------------------|-------------------------|-------------------------|-------------------------|-------------------------------------------------|
| N1–H⋯N4 <sup>a</sup>                            | 0.930                   | 2.280                   | 3.095                   | 145.91                                          |
| N1–H⋯N5 <sup>b</sup>                            | 0.930                   | 2.372                   | 3.131                   | 138.70                                          |
| O1 <sub>w</sub> –H⋯O2 <sub>w</sub> <sup>c</sup> | 0.855                   | 1.949                   | 2.790                   | 167.37                                          |
| O3 <sub>w</sub> –H⋯O4 <sub>w</sub> <sup>d</sup> | 0.852                   | 1.925                   | 2.727                   | 156.30                                          |
| O3 <sub>w</sub> –H⋯O4                           | 0.849                   | 1.980                   | 2.818                   | 169.06                                          |
| O4 <sub>w</sub> –H⋯O1 <sub>w</sub> <sup>e</sup> | 0.851                   | 2.038                   | 2.874                   | 167.35                                          |
| O2 <sub>w</sub> –H⋯O2                           | 0.852                   | 1.972                   | 2.816                   | 170.58                                          |
| O4 <sub>w</sub> –H⋯O4                           | 0.851                   | 1.929                   | 2.780                   | 176.93                                          |
| O1 <sub>w</sub> –H⋯O2                           | 0.852                   | 1.928                   | 2.775                   | 172.15                                          |
| O2 <sub>w</sub> –H⋯O3 <sub>w</sub> <sup>f</sup> | 0.852                   | 1.971                   | 2.808                   | 167.41                                          |

Symmetry transformations: (a)  $-x, y - 1/2, -z + 1/2$ ; (b)  $-x, y - 1/2, -z + 1/2$ ; (c)  $x + 1, y, z$ ; (d)  $x + 1, y, z$ ; (e)  $-x, y + 1/2, -z + 1/2$ ; (f)  $-x, y - 1/2, -z + 1/2$ .

**Table S9.** Hydrogen bonds observed in compound **5** (Hphen)[VO(H<sub>2</sub>O)(nta)]·2H<sub>2</sub>O.

| <i>D</i> – <i>H</i> ⋯ <i>A</i>     | <i>D</i> – <i>H</i> (Å) | <i>H</i> ⋯ <i>A</i> (Å) | <i>D</i> ⋯ <i>A</i> (Å) | <i>D</i> – <i>H</i> ⋯ <i>A</i> ( <sup>o</sup> ) |
|------------------------------------|-------------------------|-------------------------|-------------------------|-------------------------------------------------|
| N2–H⋯O3 <sub>w</sub> <sup>a</sup>  | 0.880                   | 1.871                   | 2.706                   | 157.57                                          |
| O1 <sub>w</sub> ⋯O4 <sup>b</sup>   | 0.840                   | 1.823                   | 2.627                   | 159.86                                          |
| O1 <sub>w</sub> –H⋯O2 <sup>c</sup> | 0.840                   | 1.832                   | 2.669                   | 174.43                                          |
| O2 <sub>w</sub> –H⋯O6 <sup>d</sup> | 0.851                   | 1.987                   | 2.789                   | 156.81                                          |
| O2 <sub>w</sub> –H⋯O5              | 0.843                   | 1.957                   | 2.786                   | 167.35                                          |
| O3 <sub>w</sub> –H⋯O2 <sub>w</sub> | 0.851                   | 1.957                   | 2.789                   | 165.65                                          |
| O3 <sub>w</sub> –H⋯O1              | 0.845                   | 2.066                   | 2.872                   | 159.09                                          |

Symmetry transformations: (a)  $-x + 1, y + 1/2, -z + 1/2$ ; (b)  $x, -y + 3/2, z - 1/2$ ; (c)  $x, -y + 3/2, z + 1/2$ ; (d)  $-x + 1, -y + 1, -z + 1$ .

**Table S10.** The comparison of anti-proliferation activity for compound **2**, the marketed platinum-based drugs and other vanadium(IV) on hepatoma cells.

|                                          | Hepatoma<br>cell lines           | IC <sub>50</sub> (μM)<br>48h | Refs          |    |
|------------------------------------------|----------------------------------|------------------------------|---------------|----|
| Complex <b>2</b>                         | HepG2                            | 29.07 ± 0.017                | This work     |    |
|                                          | SMMC-7721                        | 5.34 ± 0.034                 | This work     |    |
| Cisplatin                                | HepG2                            | 12.75 ± 0.80                 | 63            |    |
|                                          | SMMC-7721                        | 30.56 ± 0.80                 | 63            |    |
|                                          | Hep3B                            | 4.97 ± 0.86                  | 64            |    |
|                                          | BEL-7404                         | 11.1 ± 0.6                   | 65            |    |
| Oxaliplatin                              | HepG2                            | 12.10 ± 5.03                 | 66            |    |
|                                          | BEL-7404                         | 24.7 ± 3.3                   | 64            |    |
| Carboplatin                              | BEL-7404                         | 190.8 ± 17.8                 | 65            |    |
|                                          | [V <sup>IV</sup> O(satsc)(phen)] | BEL-7402                     | 55.16 ± 3.89  | 67 |
|                                          |                                  | HUH-7                        | 47.93 ± 4.22  | 67 |
| [V <sup>IV</sup> O(3,5-dibrsatsc)(phen)] |                                  | HepG2                        | 6.80 ± 0.76   | 67 |
|                                          |                                  | BEL-7402                     | 19.46 ± 2.14  | 67 |
|                                          |                                  | HUH-7                        | 11.65 ± 1.85  | 67 |
| [V <sup>IV</sup> O(msatsc)(phen)]        |                                  | HepG2                        | 1.68 ± 0.41   | 67 |
|                                          |                                  | BEL-7402                     | 30.80 ± 13.05 | 68 |
|                                          |                                  | HUH-7                        | 2.87 ± 0.23   | 68 |
| [V <sup>IV</sup> O(4-chlorosatsc)(phen)] |                                  | HepG2                        | 1.81 ± 0.38   | 68 |
|                                          |                                  | BEL-7402                     | 17.02 ± 3.69  | 68 |
|                                          |                                  | HUH-7                        | 1.98 ± 0.72   | 68 |
|                                          |                                  | HepG2                        | 1.33 ± 0.37   | 68 |

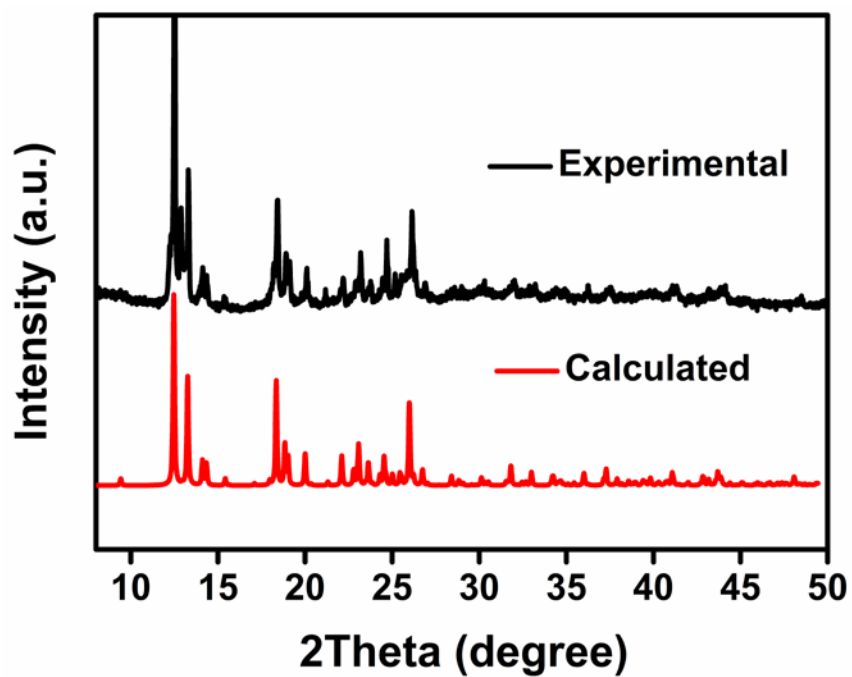

**Figure S1.** Calculated and experimental powder X-ray diffraction (PXRD) patterns of compound 1.

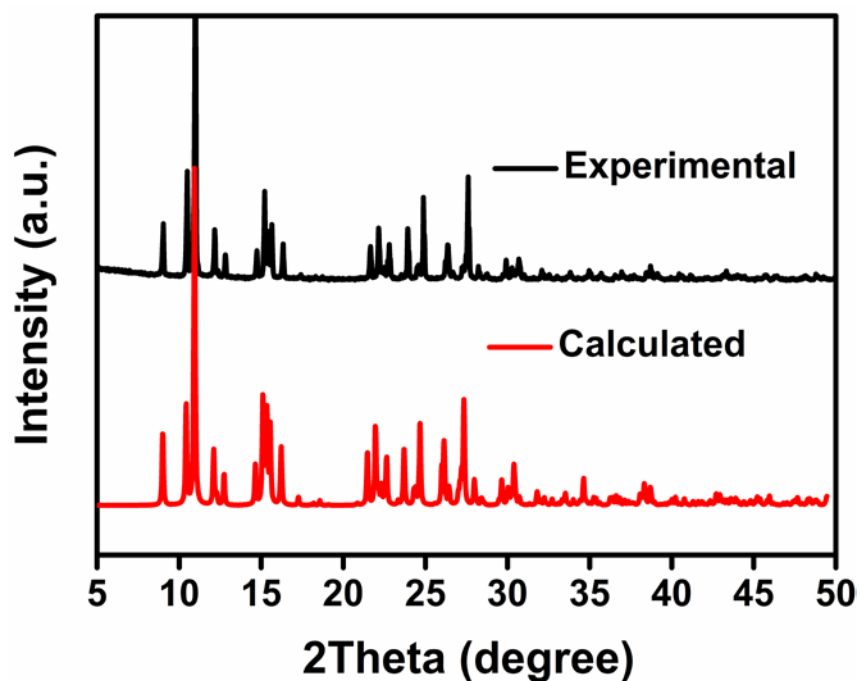

**Figure S2.** Calculated and experimental powder X-ray diffraction (PXRD) patterns of compound 2.

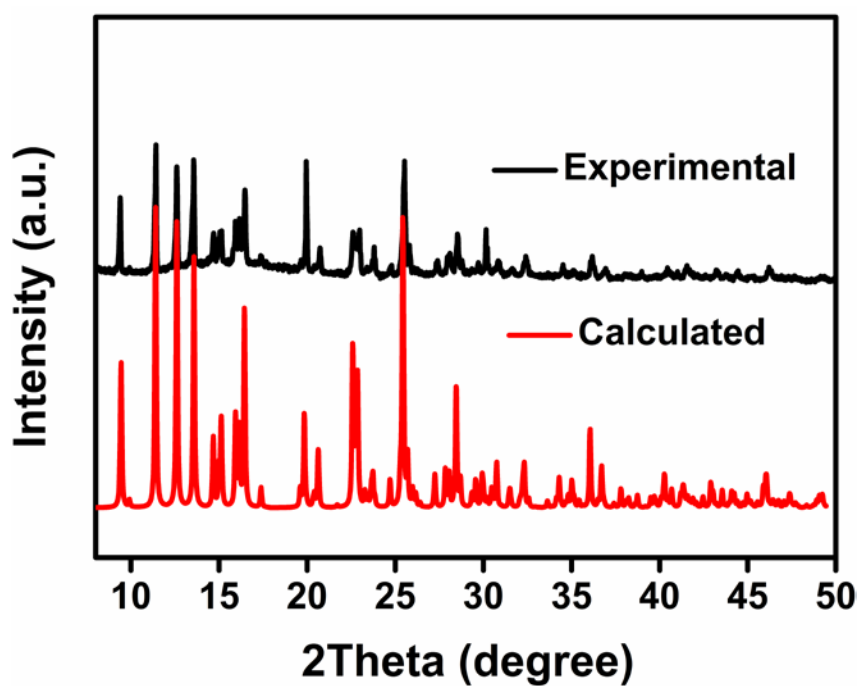

**Figure S3.** Calculated and experimental powder X-ray diffraction (PXRD) patterns of compound 3.

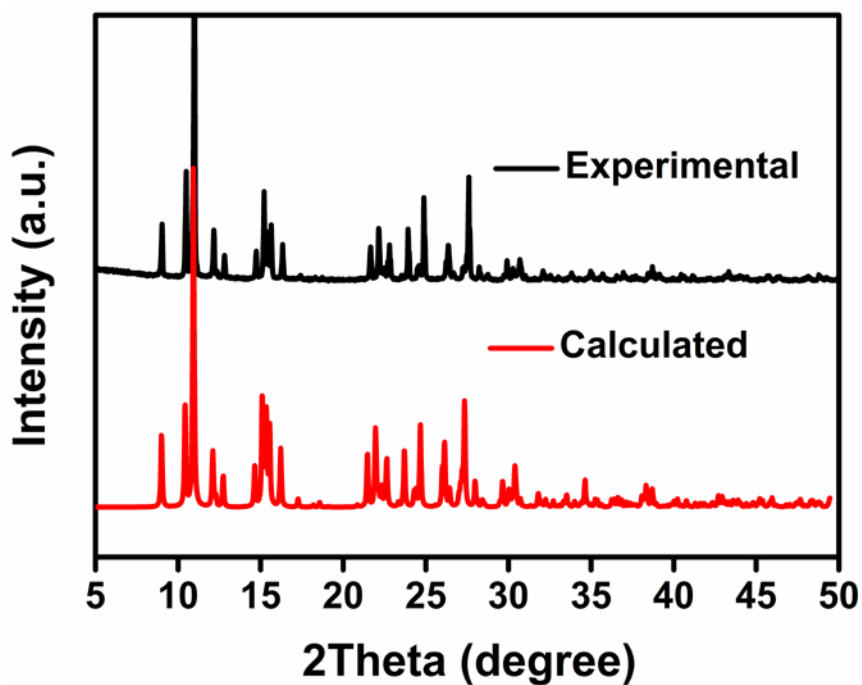

**Figure S4.** Calculated and experimental powder X-ray diffraction (PXRD) patterns of compound 4

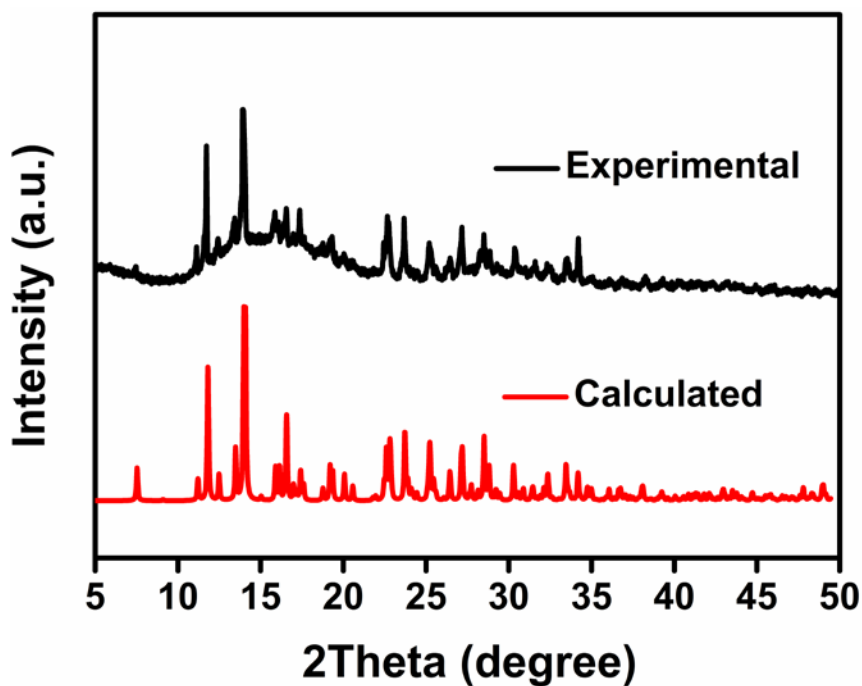

**Figure S5.** Calculated and experimental powder X-ray diffraction (PXRD) patterns of compound 5.

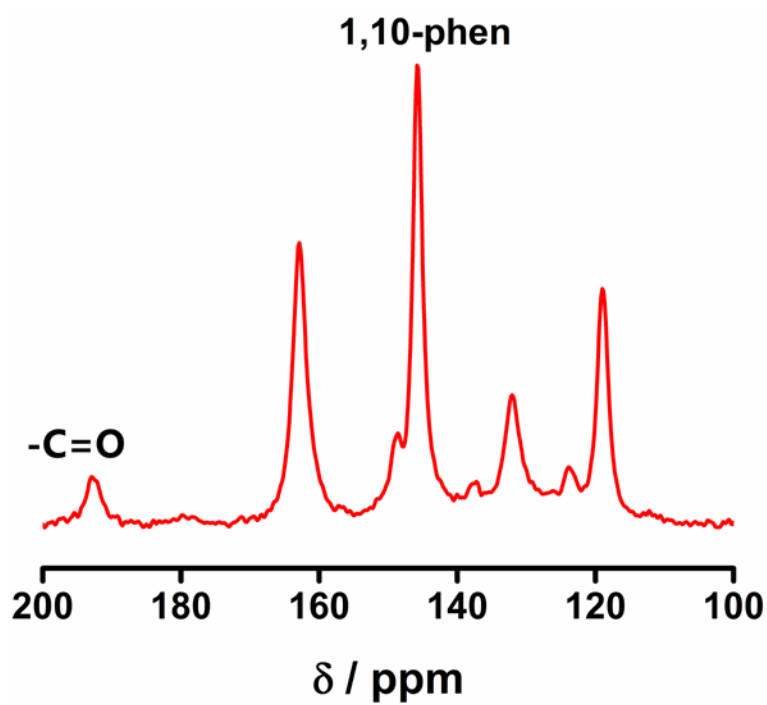

**Figure S6.** Solid state  $^{13}\text{C}$  NMR spectrum of compound 2.

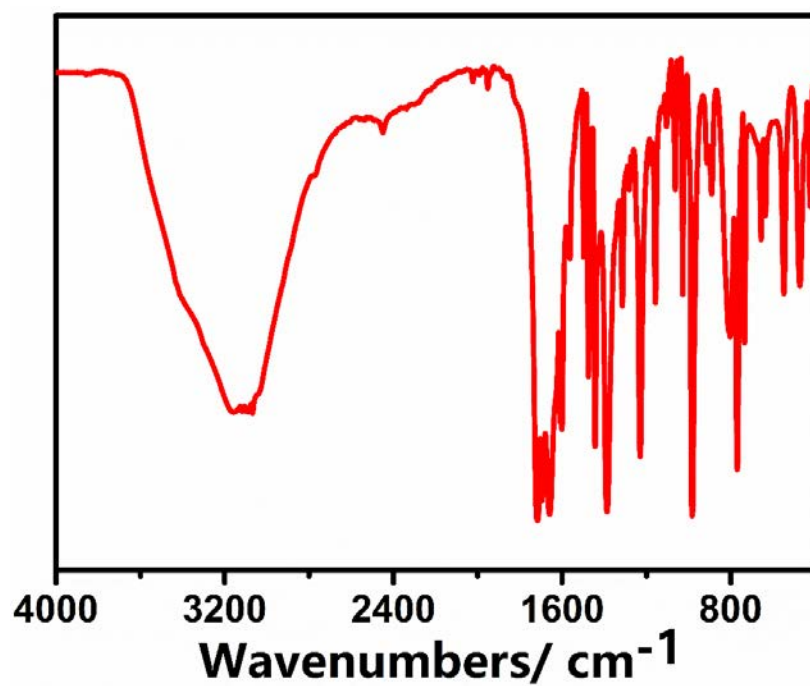

**Figure S7.** The FT-IR spectrum of vanadyl compound 1.

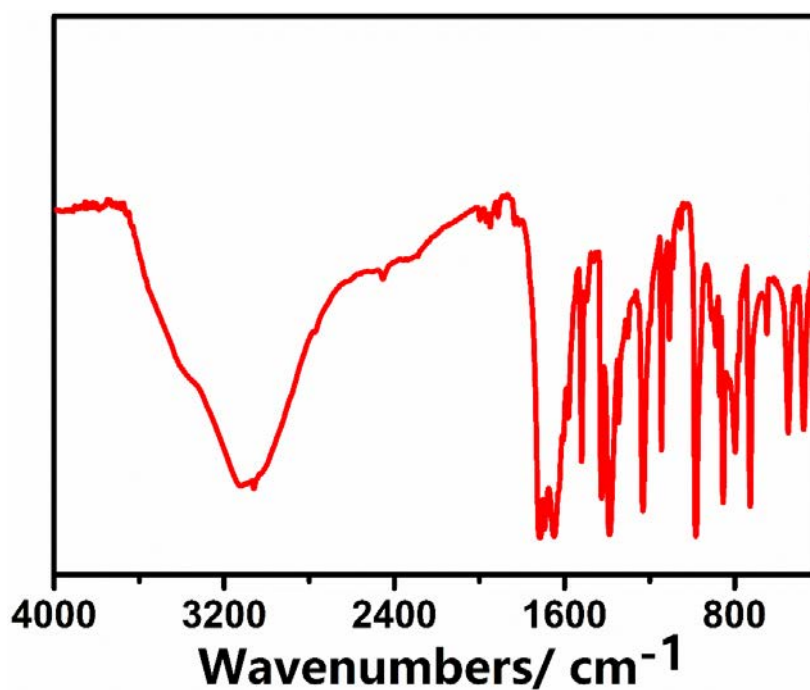

**Figure S8.** The FT-IR spectrum of vanadyl compound 2.



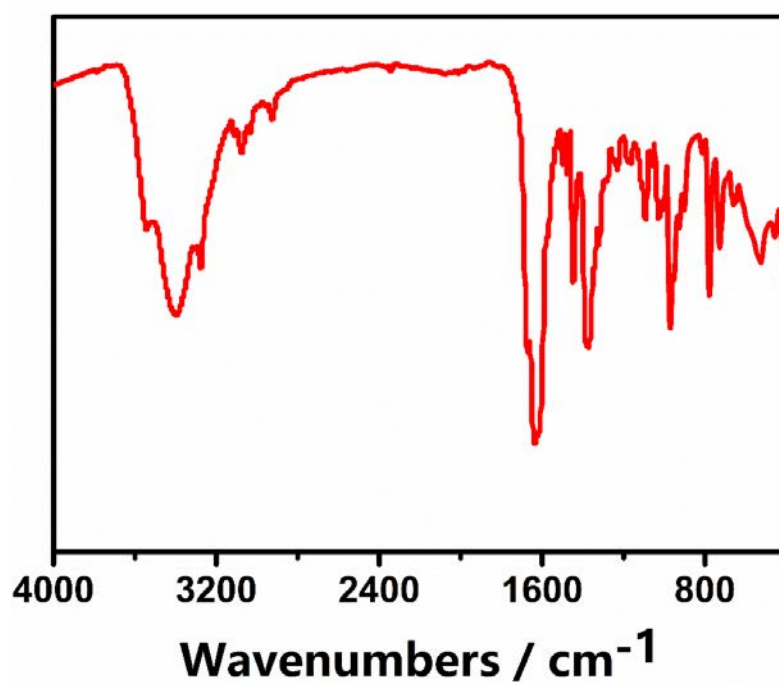

**Figure S9.** The FT-IR spectrum of vanadyl compound 3.

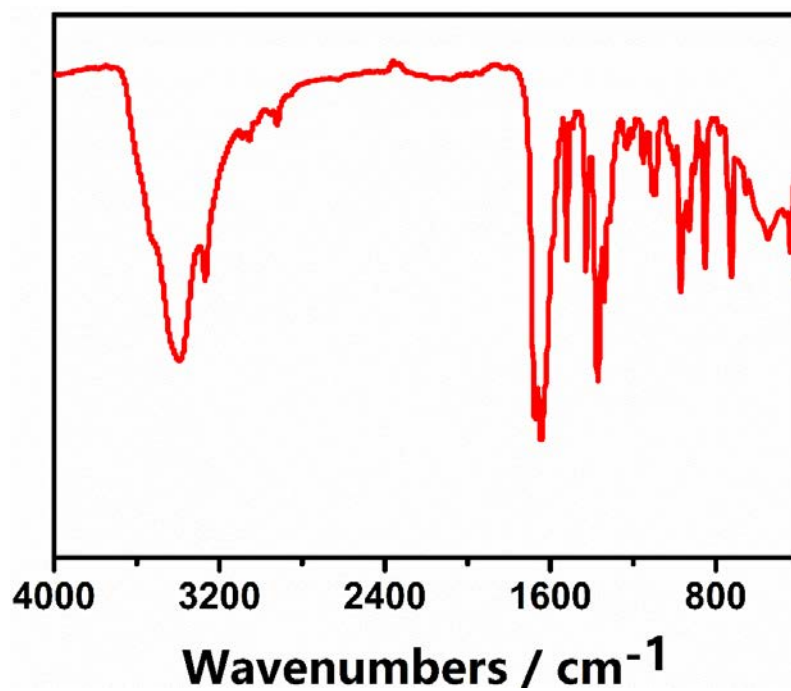

**Figure S10.** The FT-IR spectrum of vanadyl compound 4.

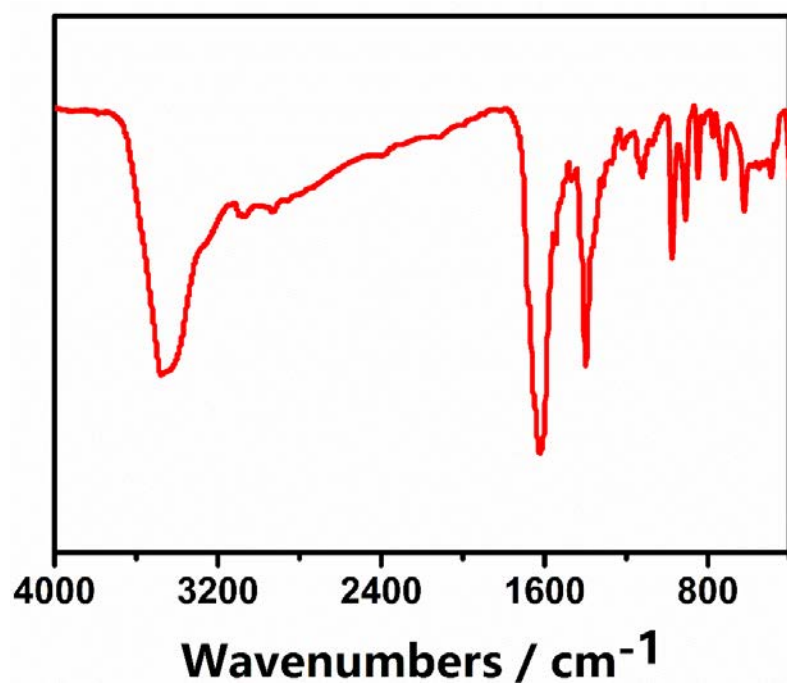

Figure S11. The FT-IR spectrum of vanadyl compound 5.

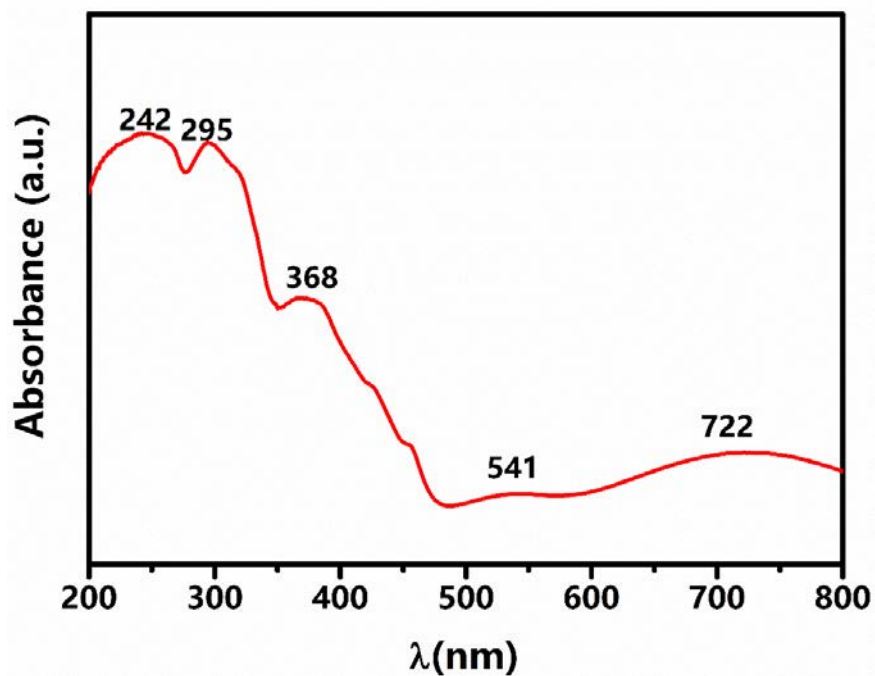

Figure S12. The solid diffuse UV-Vis spectrum of vanadyl compound 1.

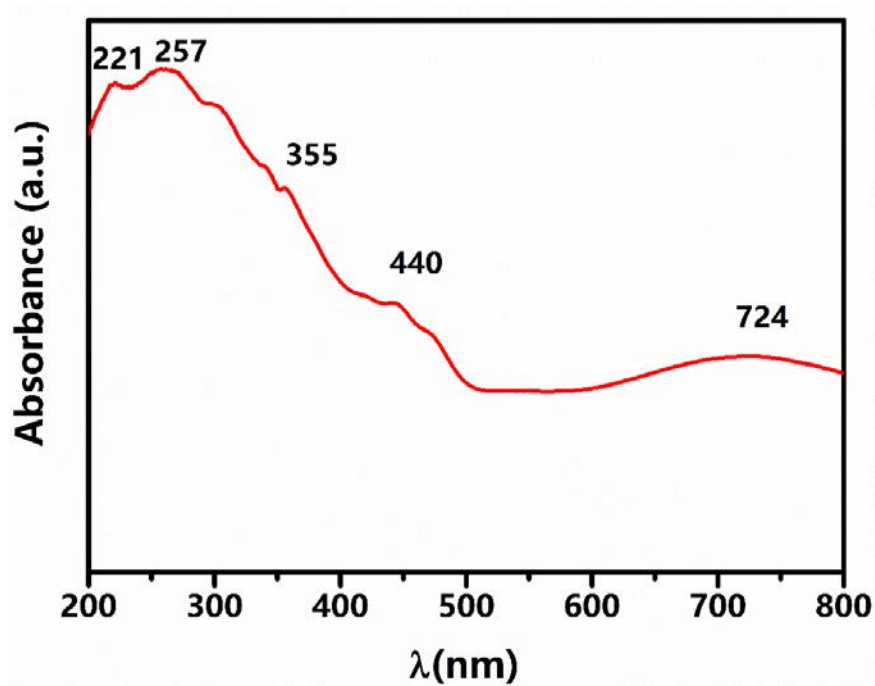

Figure S13. The solid diffuse UV-Vis spectrum of vanadyl compound 2.

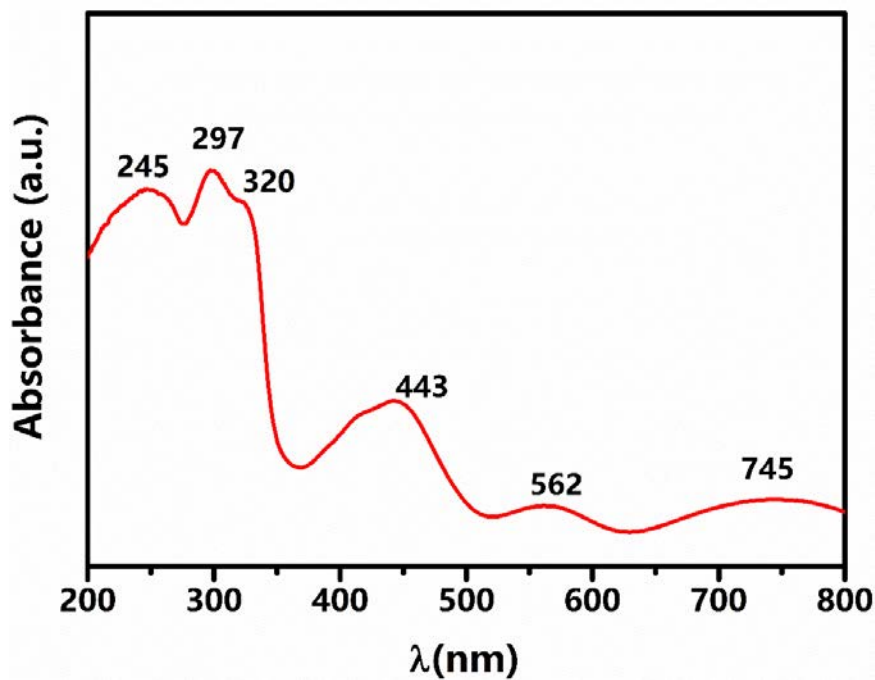

Figure S14. The solid diffuse UV-Vis spectrum of vanadyl compound 3.

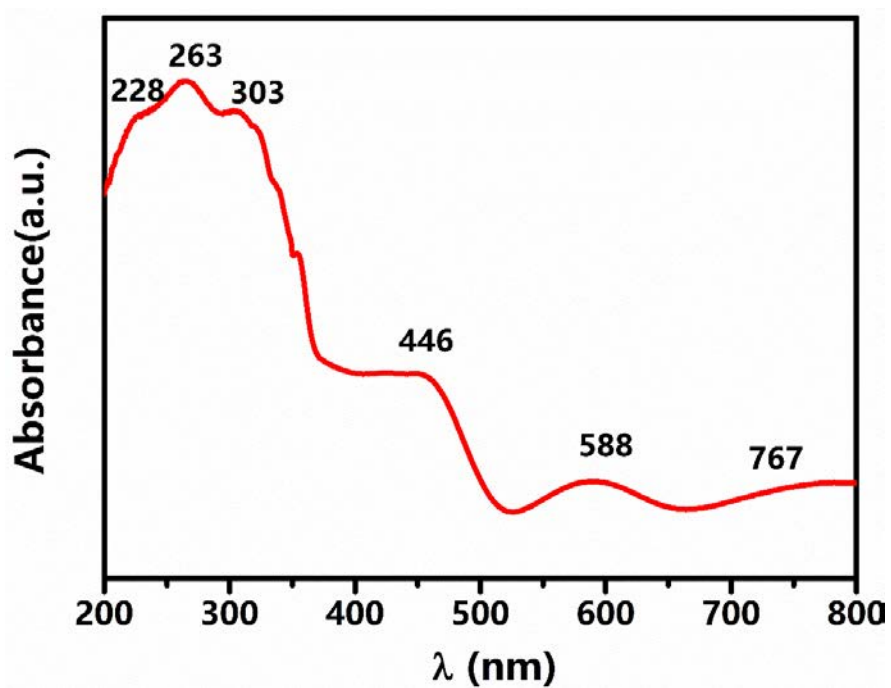

Figure S15. The solid diffuse UV-Vis spectrum of vanadyl compound 4.

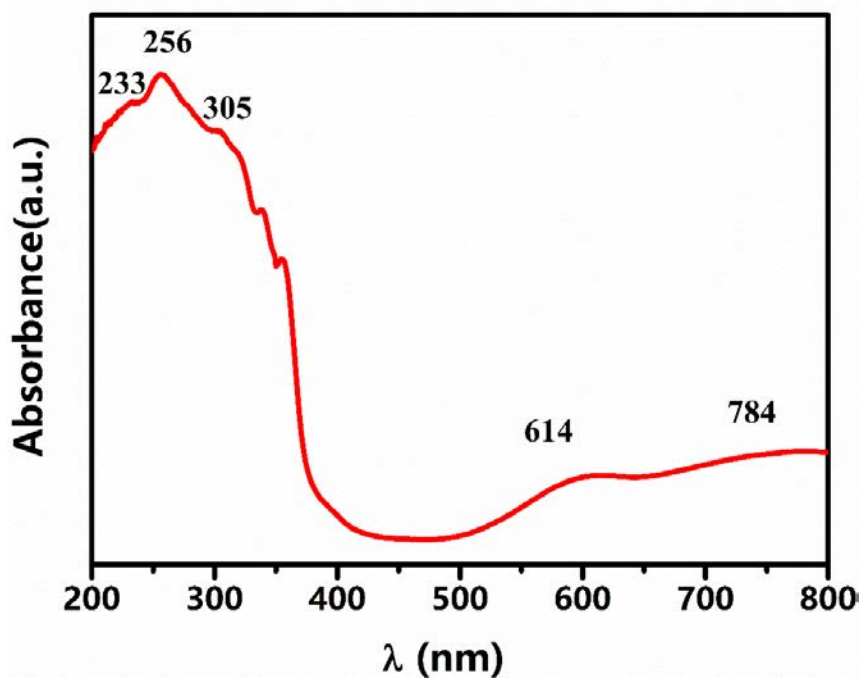

Figure S16. The solid diffuse UV-Vis spectrum of vanadyl compound 5.

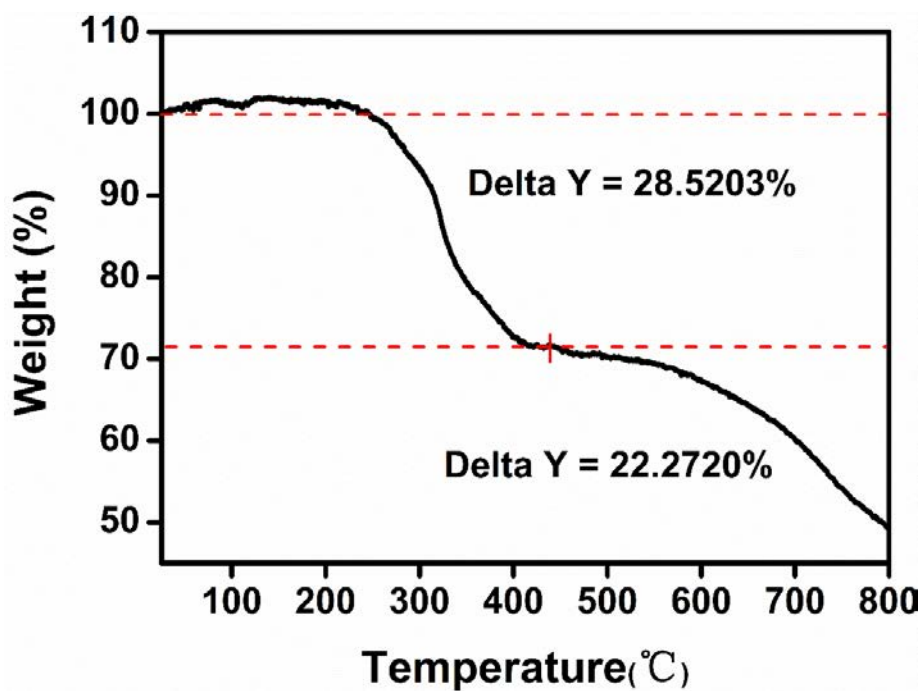

Figure S17. The thermal gravimetric analysis of compound 2.

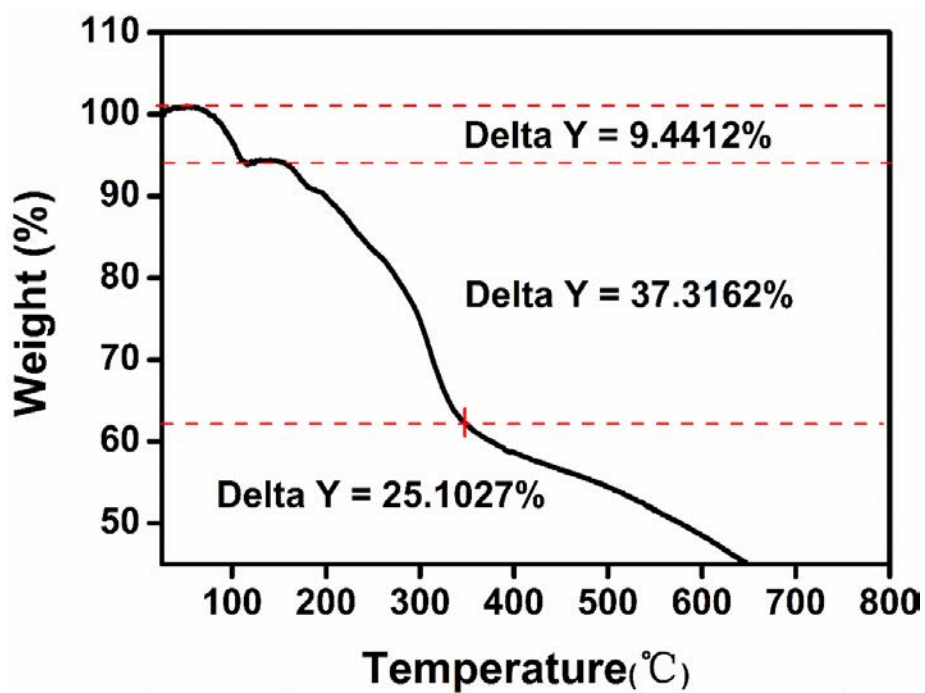

Figure S18. The thermal gravimetric analysis of compound 5.

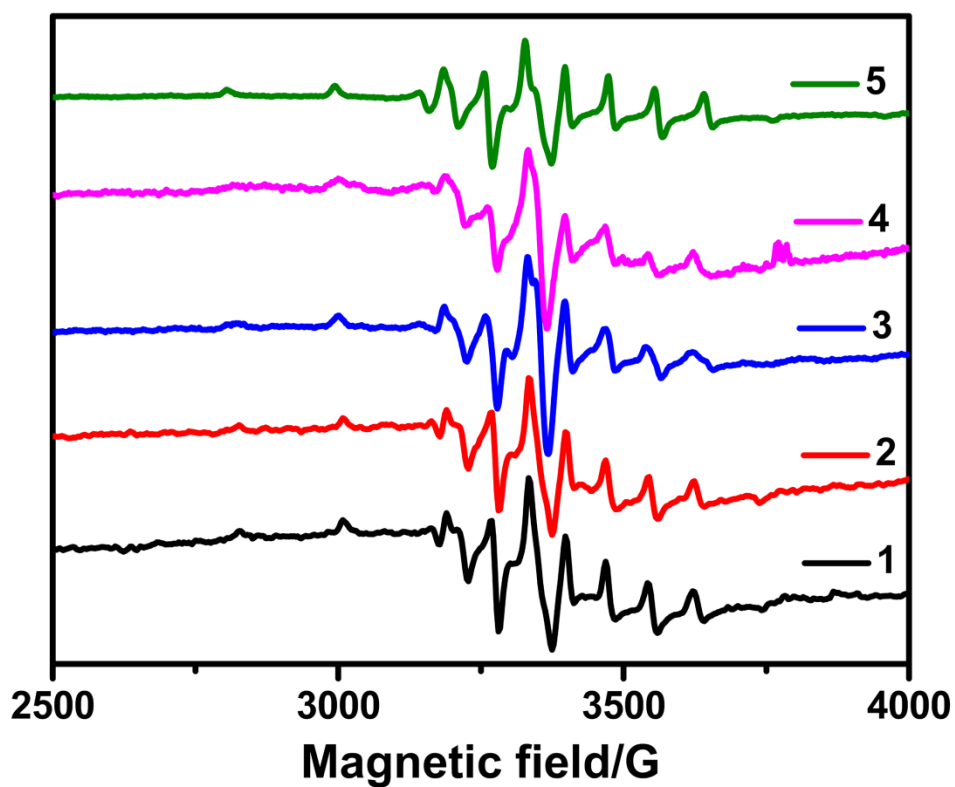

**Figure S19.** EPR spectra of compounds **1-5** in DMSO at 130 K ( $t = 0$  h)

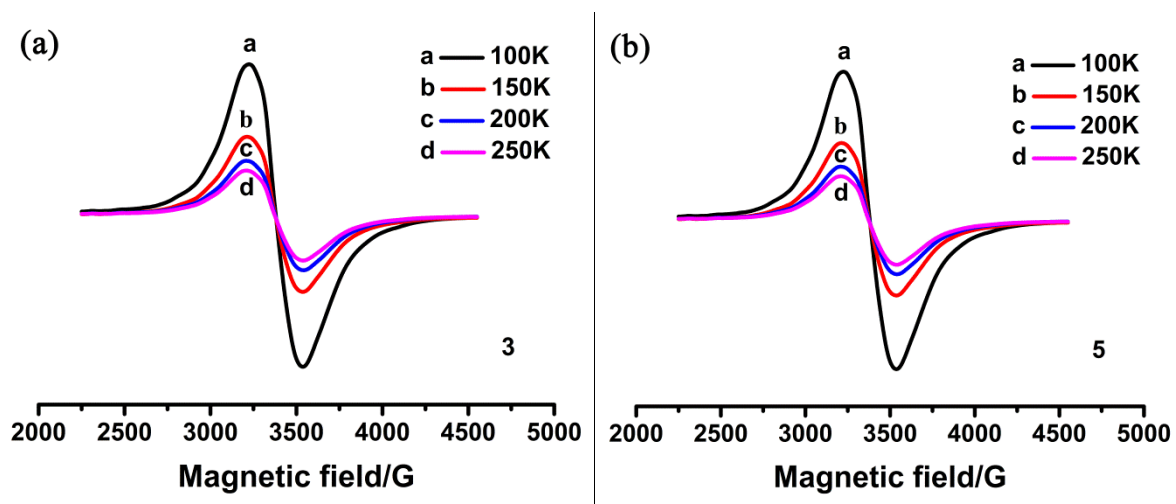

**Figure S20.** X-band EPR spectra in solid state of (a) compound **3**, (b) compound **5** at various temperatures.

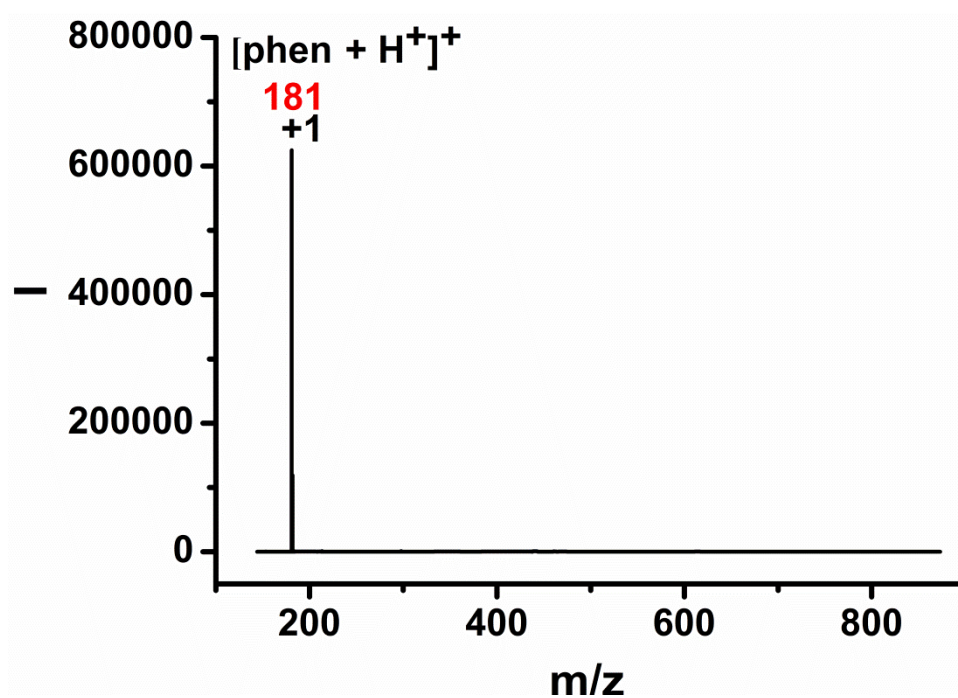

Figure S21. ESI-MS spectrum of compound 5 in positive ion mode.

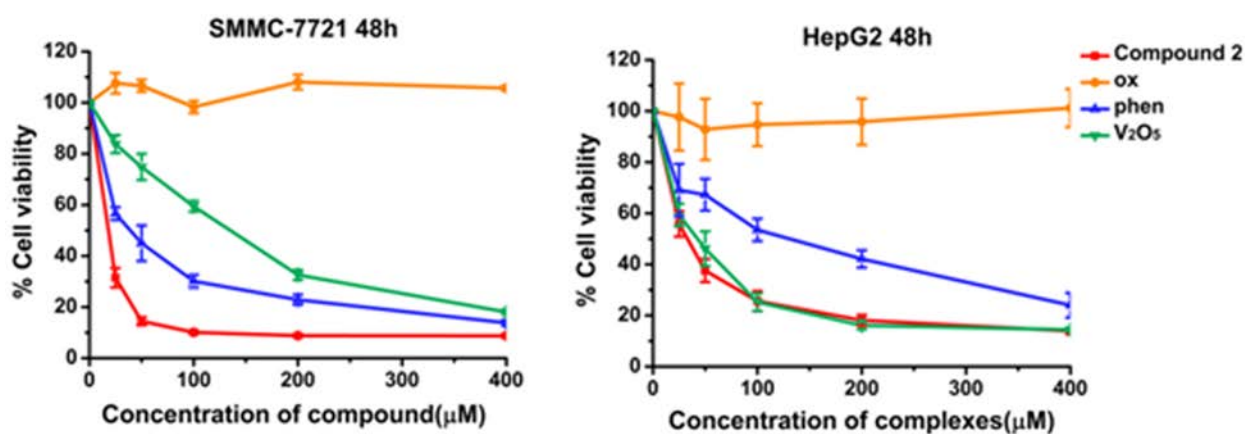

Figure S22. SMMC-7721 and HepG2 cells were incubated with various concentrations of compound 2, and ligands for 48 h, respectively.

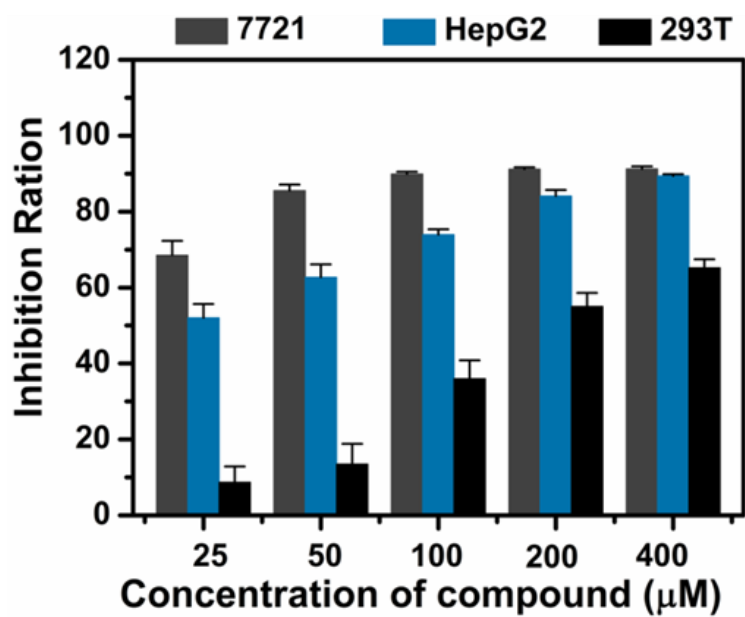

**Figure S23.** Inhibitory effect of compound 2 on SMMC-7721, HepG2 and 293T cells after 48 h (n = 3, error bar = S.D.).
